# Supplementary material for: Facile fabrication of PtNP/MWCNT nanohybrid films for flexible counter electrode in dye-sensitized solar cells
Source: Royal Society of Chemistry journal article supplement (doi:10.1039/c2jm15614h), 2012-01-01
Supplement: c2jm15614h.pdf [file c2jm15614h.pdf]

# Facile fabrication of PtNP/MWCNT nanohybrid films for flexible counter electrode in dye-sensitized solar cells

Ling-Yu Chang<sup>a</sup>, Chuan-Pei Lee<sup>b</sup>, Kuan-Chieh Huang<sup>b</sup>, Ying-Chiao Wang<sup>a</sup>,

Min-Hsin Yeh<sup>b</sup>, Jiang-Jen Lin<sup>a\*</sup>, and Kuo-Chuan Ho<sup>a,b\*</sup>

<sup>a</sup>Institute of Polymer Science and Engineering, National Taiwan University, Taipei 10617, Taiwan

<sup>b</sup>Department of Chemical Engineering, National Taiwan University, Taipei 10617, Taiwan

Corresponding authors:

<sup>a\*</sup> E-mail: [jianglin@ntu.edu.tw](mailto:jianglin@ntu.edu.tw); Tel: +886-2-3366-5312; Fax: +886-2-3366-5237

<sup>b\*</sup> E-mail: [kcho@ntu.edu.tw](mailto:kcho@ntu.edu.tw); Tel: +886-2-2366-0739; Fax: +886-2-2362-3040

## Electronic Supporting Information

Table S1 Photovoltaic parameters of the DSSCs using PtNP/MWCNT/POEM CEs with different weight ratios of 2/1/30 and 2/1/10, measured at  $100 \text{ mW cm}^{-2}$  light intensity.

Table S2 Photovoltaic parameters of the DSSCs using PtNP/MWCNT/POEM CEs with different thicknesses of 380 nm and 1  $\mu\text{m}$ , measured at  $100 \text{ mW cm}^{-2}$  light intensity.

Figure S1 (a) Photograph showing the PtNP/MWCNT dispersed with and without POEM in ethanol (0.1 wt% in ethanol). The photographs were taken 1 week after the preparation of the dispersed carbon materials. (b) The stability of PtNP/MWCNT with and without POEM dispersion was monitored by its absorbance (at 261 nm) in the visible range, which stayed nearly constant over a period of 72 h.

Figure S2 Photocurrent density–voltage curve of the DSSC using a s–Pt CE with a thinner Pt thickness of *ca.* 20 nm CE, measured at  $100 \text{ mW cm}^{-2}$  light intensity.

Figure S3 Photocurrent density–voltage curves of the DSSCs using PtNP/MWCNT/POEM CEs with various ratios of 2/1/30 and 2/1/10, measured at  $100 \text{ mW cm}^{-2}$  light intensity.

Figure S4 Photocurrent density–voltage curves of the DSSCs using PtNP/MWCNT/POEM CEs with different thicknesses of 380 nm and 1  $\mu\text{m}$ , measured at  $100 \text{ mW cm}^{-2}$  light intensity.

Figure S5 SEM cross sectional images of PtNP/MWCNT films with different

thicknesses of (a) 380 nm, (b) 1  $\mu\text{m}$ .

**Table S1**

| <b>PtNP/MWCNT/POEM</b><br><b>weight ratio</b> | <b><math>V_{OC}</math> (V)</b> | <b><math>J_{SC}</math> (mA cm<sup>-2</sup>)</b> | <b><math>FF</math></b> | <b><math>\eta</math> (%)</b> |
|-----------------------------------------------|--------------------------------|-------------------------------------------------|------------------------|------------------------------|
| 1/2/10                                        | 0.70                           | 17.49                                           | 0.73                   | 8.67                         |
| 1/2/30                                        | 0.68                           | 17.68                                           | 0.73                   | 7.95                         |

**Table S2**

| <b>PtNP/MWCNT</b><br><b>film thickness (nm)</b> | <b><math>V_{OC}</math> (V)</b> | <b><math>J_{SC}</math> (mA cm<sup>-2</sup>)</b> | <b><math>FF</math></b> | <b><math>\eta</math> (%)</b> |
|-------------------------------------------------|--------------------------------|-------------------------------------------------|------------------------|------------------------------|
| 380                                             | 0.70                           | 15.68                                           | 0.74                   | 7.72                         |
| 1000                                            | 0.70                           | 17.27                                           | 0.74                   | 8.49                         |

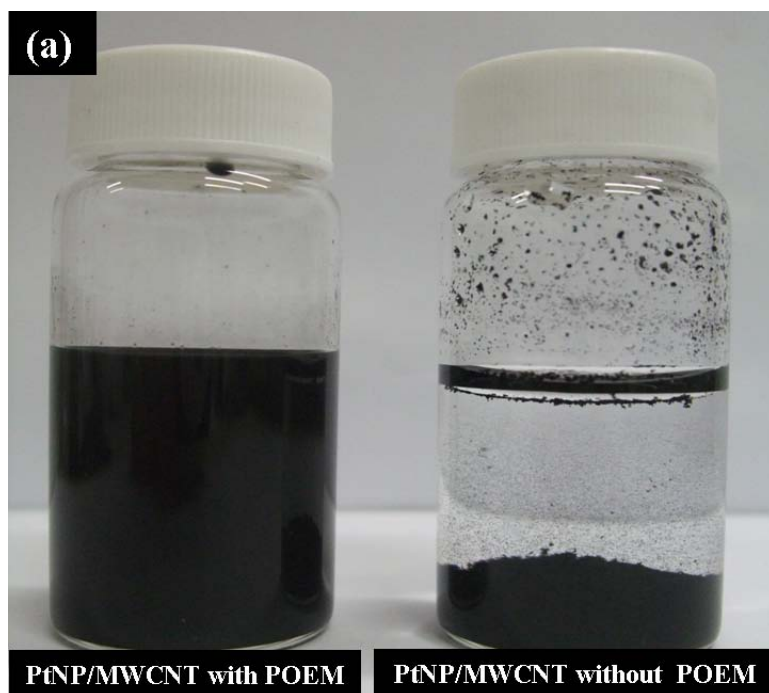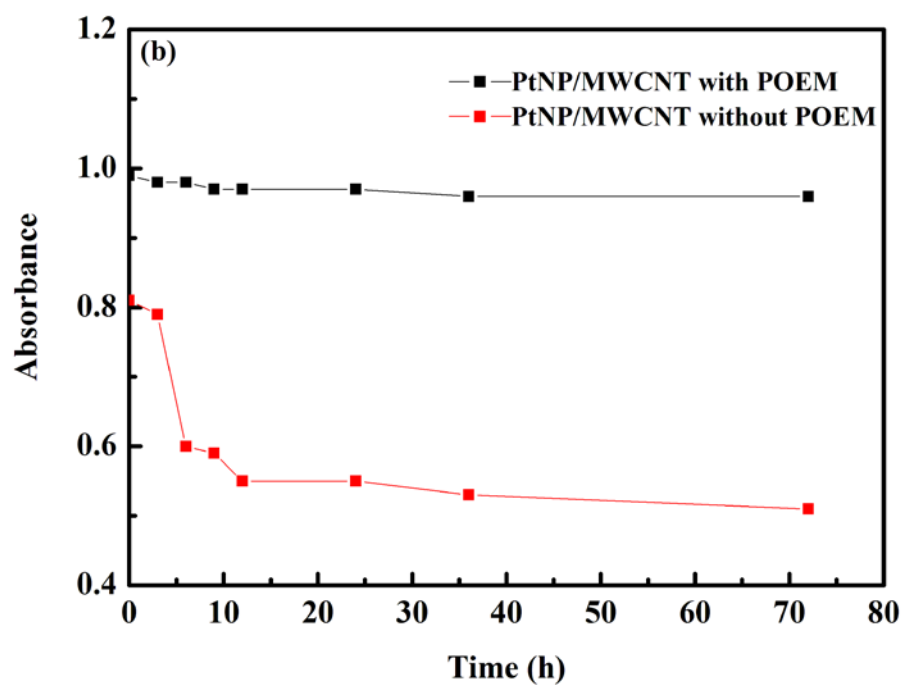

Figure S1

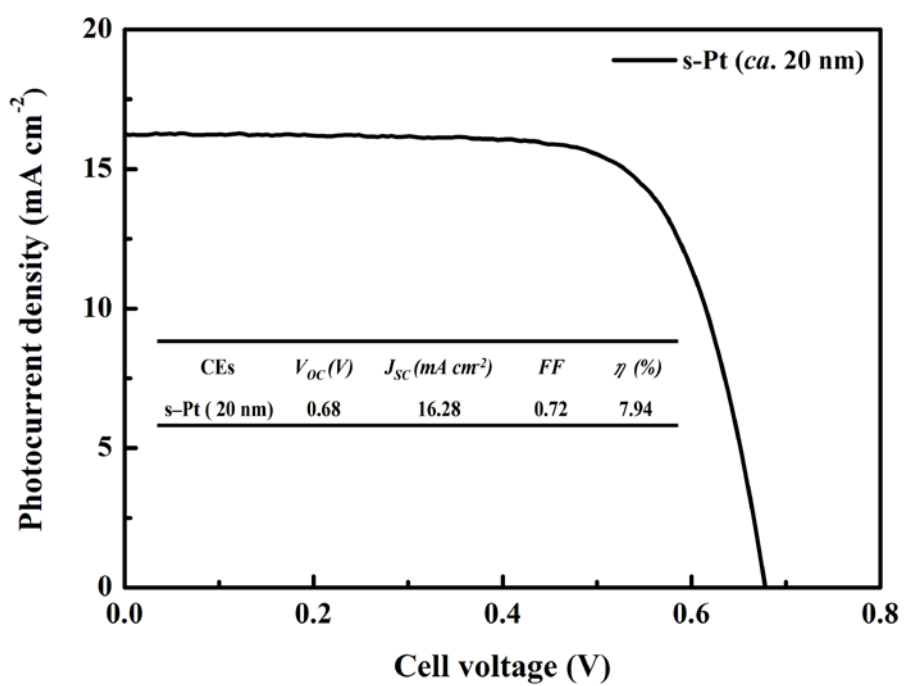

**Figure S2**

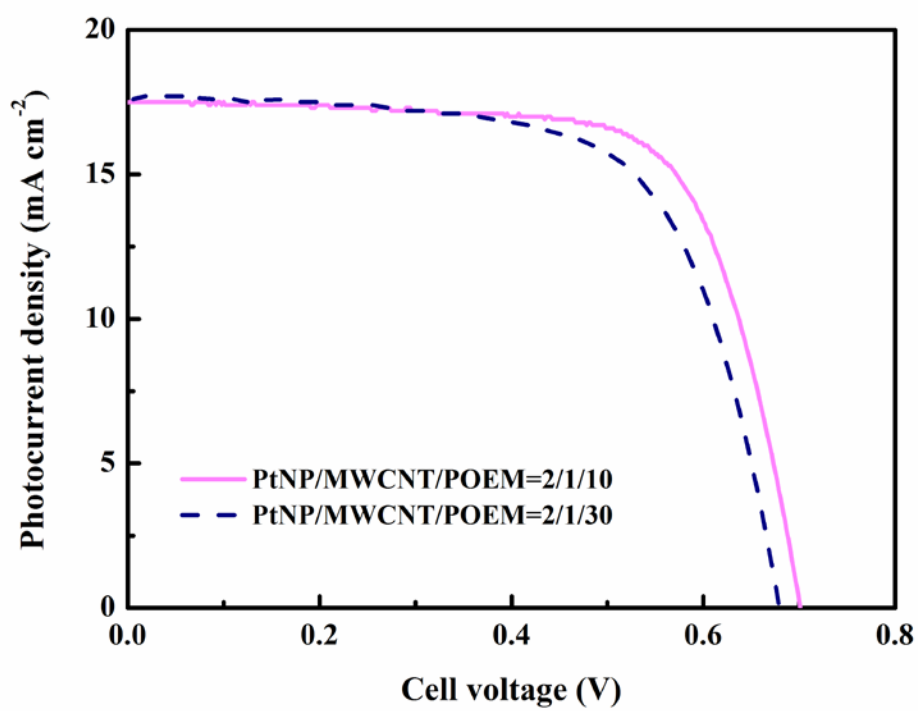

**Figure S3**

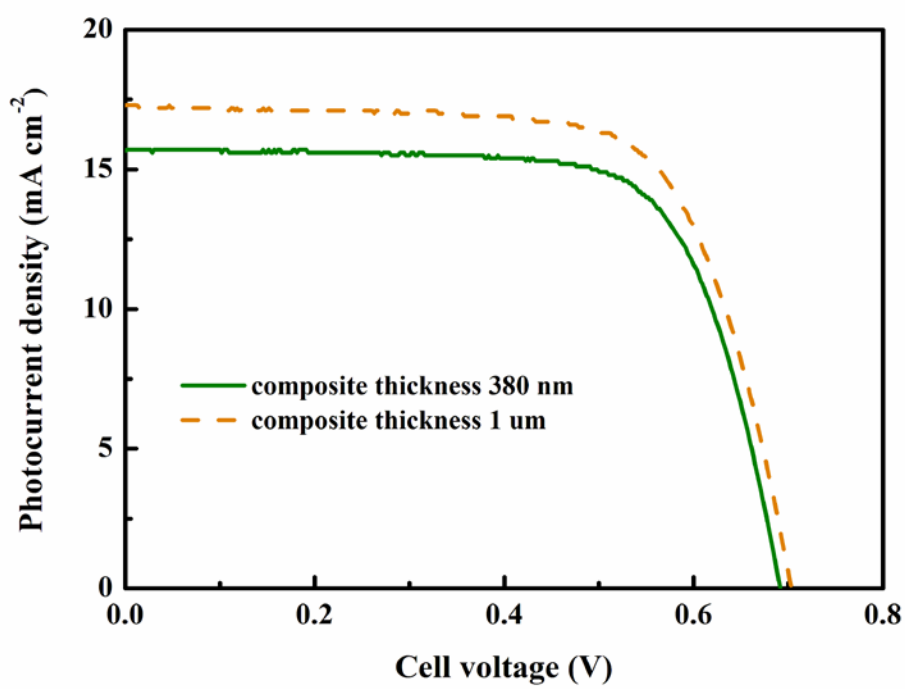

**Figure S4**



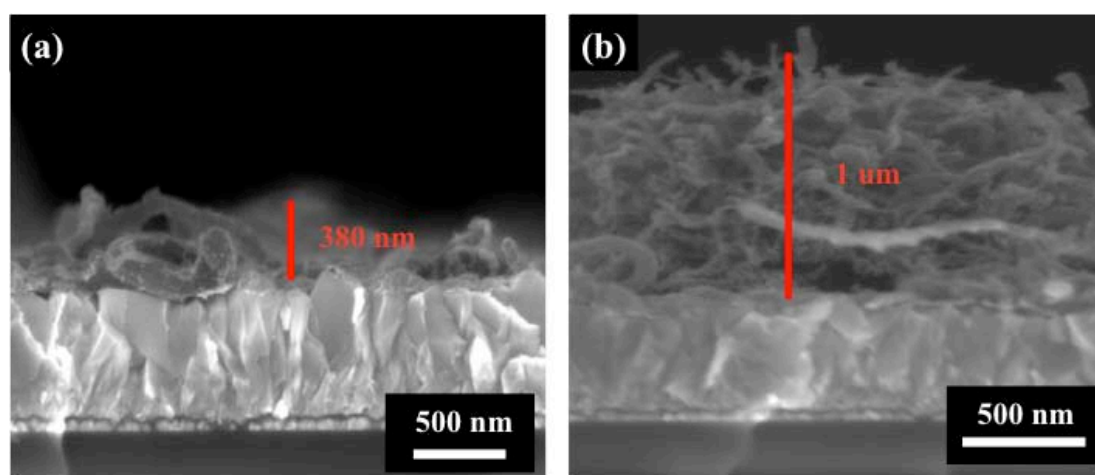

**Figure S5**
